# Supplementary material for: Incomplete Recruitment of Protective T Cells Is Associated with Trypanosoma cruzi Persistence in the Mouse Colon
Source: PubMed Central journal article supplement (PMC8853677; doi:10.1128/iai.00382-21), 2022-02-17

**Incomplete recruitment of protective T cells is associated with *Trypanosoma cruzi* persistence in the mouse colon**

Alexander I. Ward, Michael D. Lewis, Martin C. Taylor and John M. Kelly

**Supplementary Figures**

**FIG S1** Assessment of the effect of cyclophosphamide on the intracellular growth of *T. cruzi*. MA 104 cells (an African green monkey fetal kidney line) seeded into a 96-well microtitre plate were infected with *T. cruzi* CL Luc::mNeon trypomastigotes (Material and Methods). Intracellular amastigotes were allowed to proliferate for 24 hours, and cyclophosphamide was then added at a range of concentrations up to 200  $\mu$ M. 3 days later, the effect on growth relative to untreated controls was inferred from the intensity of green fluorescence recorded on a FLUOstar Omega plate reader. Data points are plotted with the standard error (n=8)

**FIG S2** Flow cytometry gating strategy. (a) PBMCs isolated in the black oval based on forward (FSC) and side (SSC) scatter spectral properties. (b) Singlets isolated. (c) Population staining +ve with anti-CD45 antibody. (d) CD45<sup>+</sup> population separated by CD3 positivity. (e) Both CD3<sup>+</sup> and CD3<sup>-</sup> populations separated by CD4 and CD8 markers.

**FIG S3** Establishing the extent of CD8<sup>+</sup> T cell recruitment to infection foci using 3-dimensional serial Z-stack confocal imaging. (a) A parasite nest detected in the whole mounted colonic gut wall of a mouse chronically infected with *T. cruzi* CL Luc::mNeon (Materials and Methods). Parasites, green; DNA, blue (DAPI); CD8<sup>+</sup> T cells, yellow (stained with antibody prior to mounting). The area selected for Z-stack imaging is identified by a 200  $\mu$ m diameter circle, centred on the parasite nest. (b) The local density of CD8<sup>+</sup> host cells was determined by counting the number of stained cells (yellow) in a series of Z-stack images acquired with a Zeiss LSM880 confocal microscope from 5  $\mu$ m above and below the centre of the parasite nest on the Z-axis,

a cylinder volume of  $314 \mu\text{m}^3$ . Any cells that fell within the  $200 \mu\text{m}$  diameter circle were included. The number of  $\text{CD8}^+$  T cells was calculated to be 44.

**FIG S4** The longitudinal and transverse smooth muscle layers of the colon are largely devoid of  $\text{CD45}^+$  leukocytes in non-infected C3H/HeN mice. (a) Serial Z-stack images of a whole mounted colonic gut wall from an age-matched non-infected C3H/HeN mouse. DNA, blue (DAPI);  $\text{CD45}^+$ , orange. Scale bars= $20 \mu\text{m}$ . The images correspond to the cross-sectional regions of the colon indicated in the schematic (1-5).  $\text{CD45}^+$  cells can be readily detected in the sub-mucosal layer (inset). (b) Rare example of a  $\text{CD45}^+$  cell within the longitudinal and transverse smooth muscle layers. A  $200 \mu\text{m}$  diameter circle is superimposed on the image.

Fig. S1

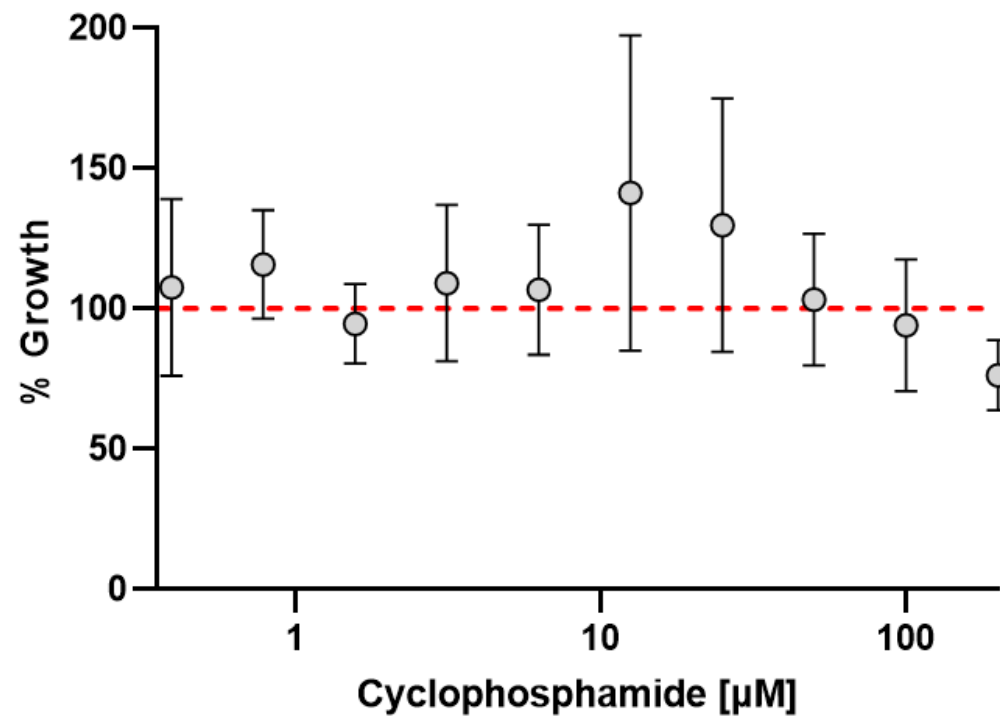

Fig. S2

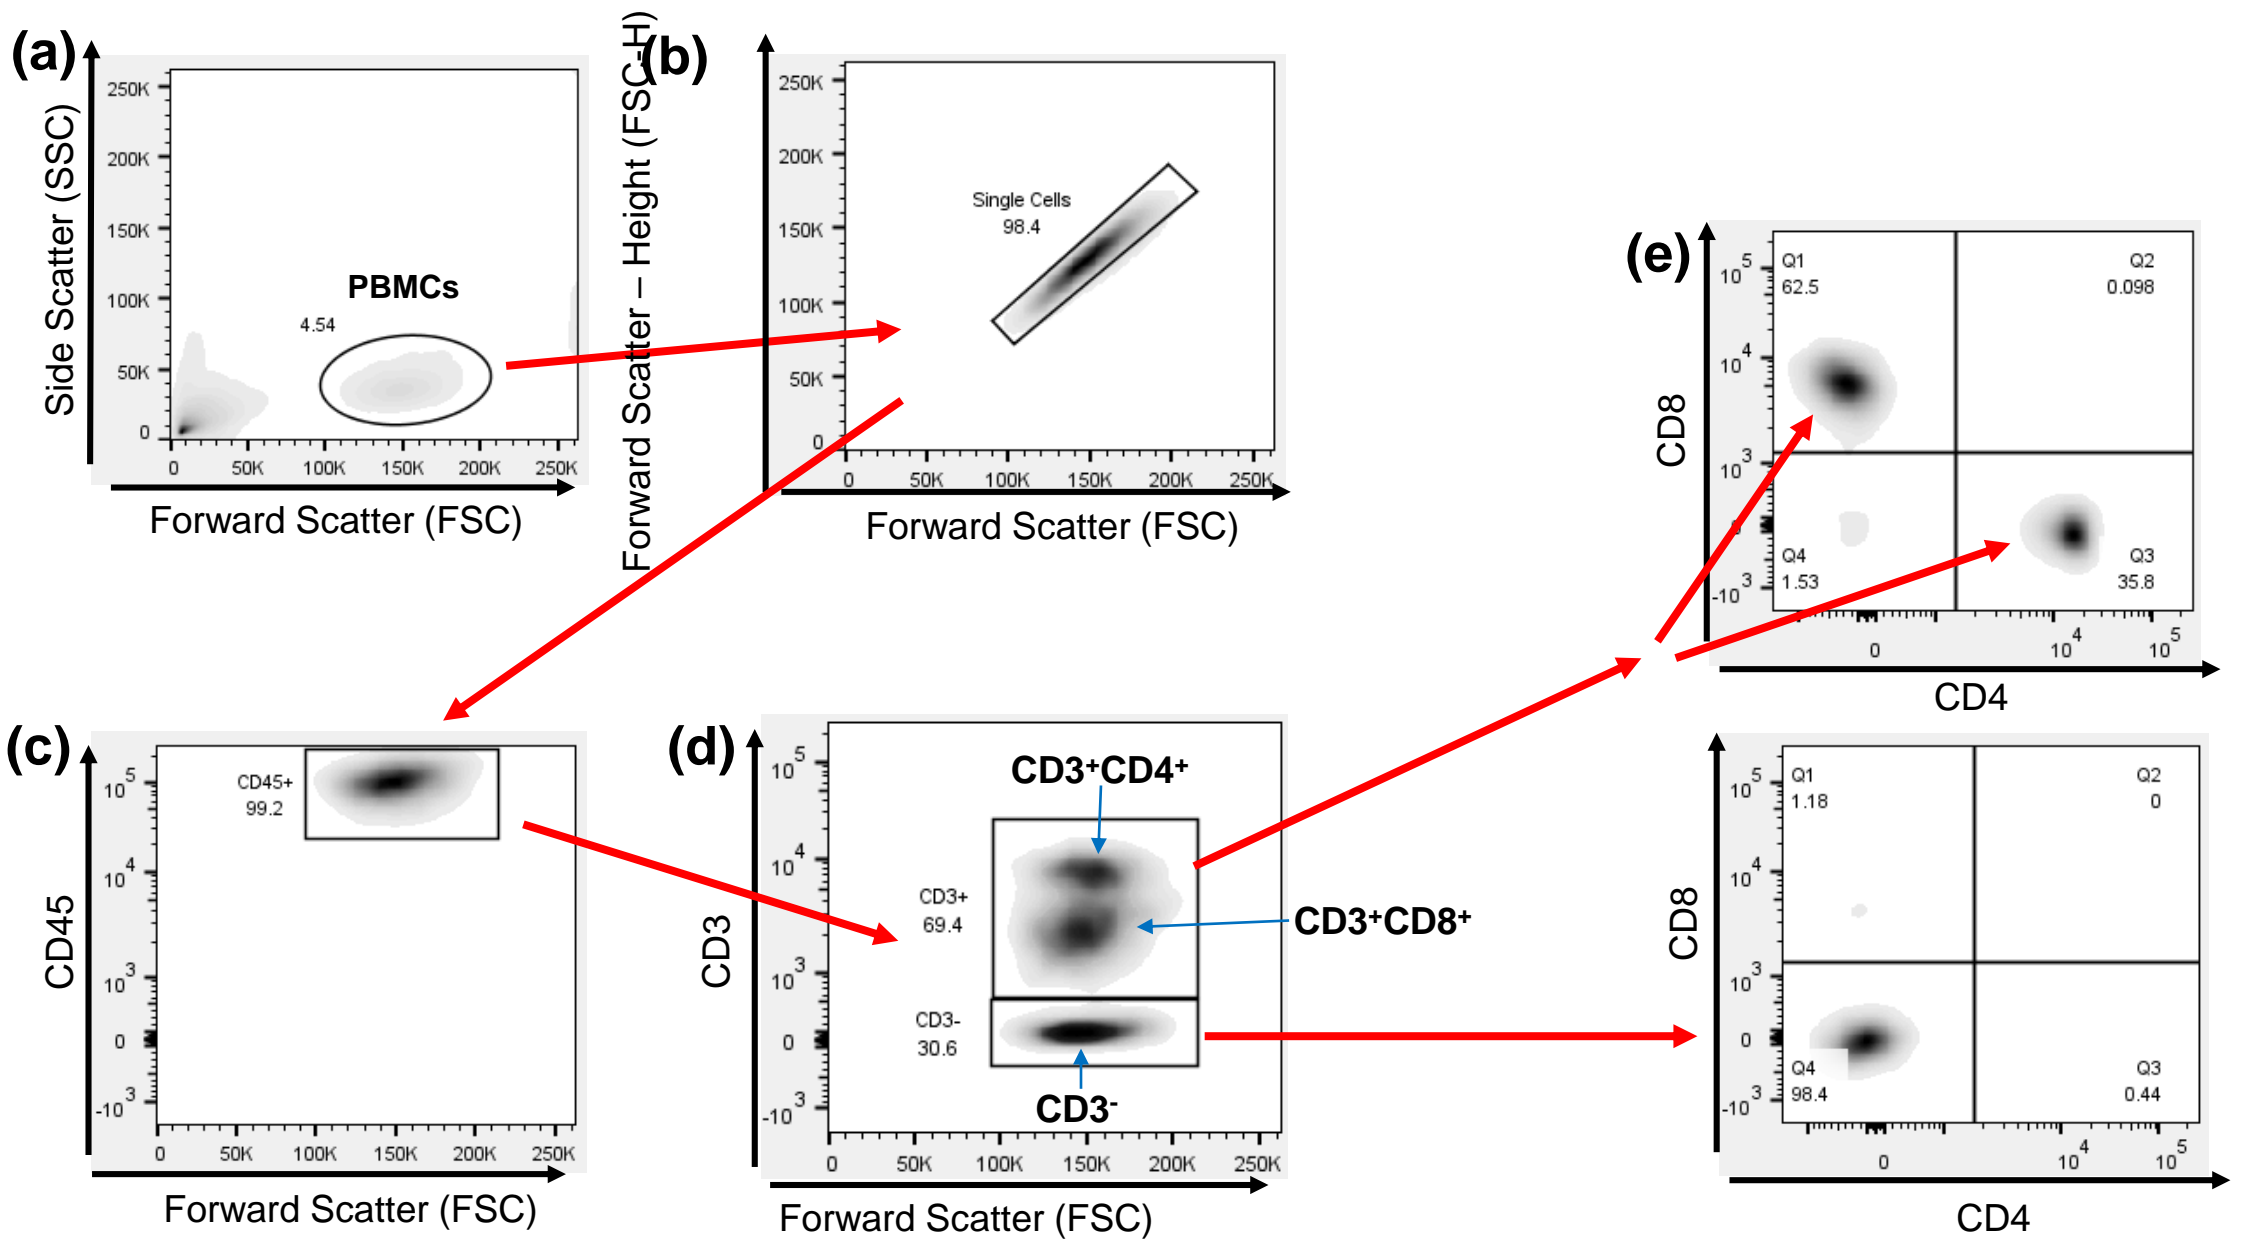

Fig. S3

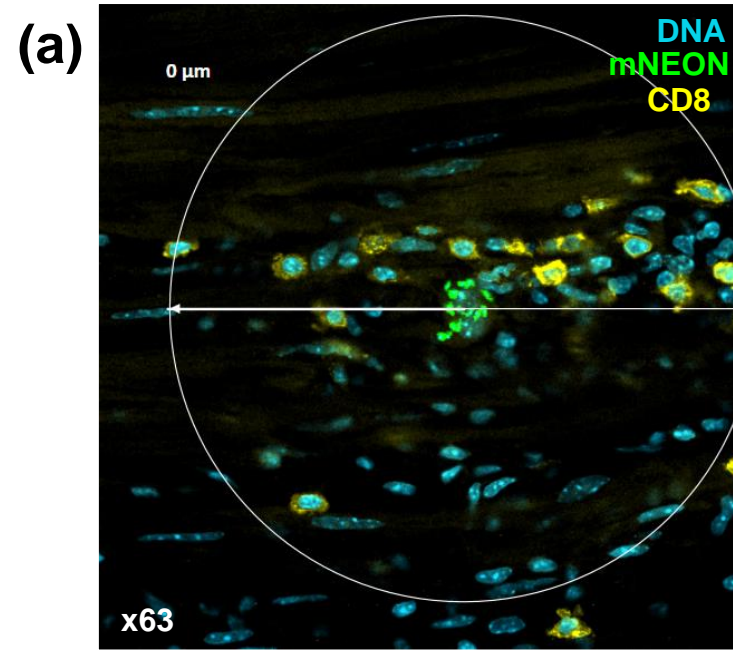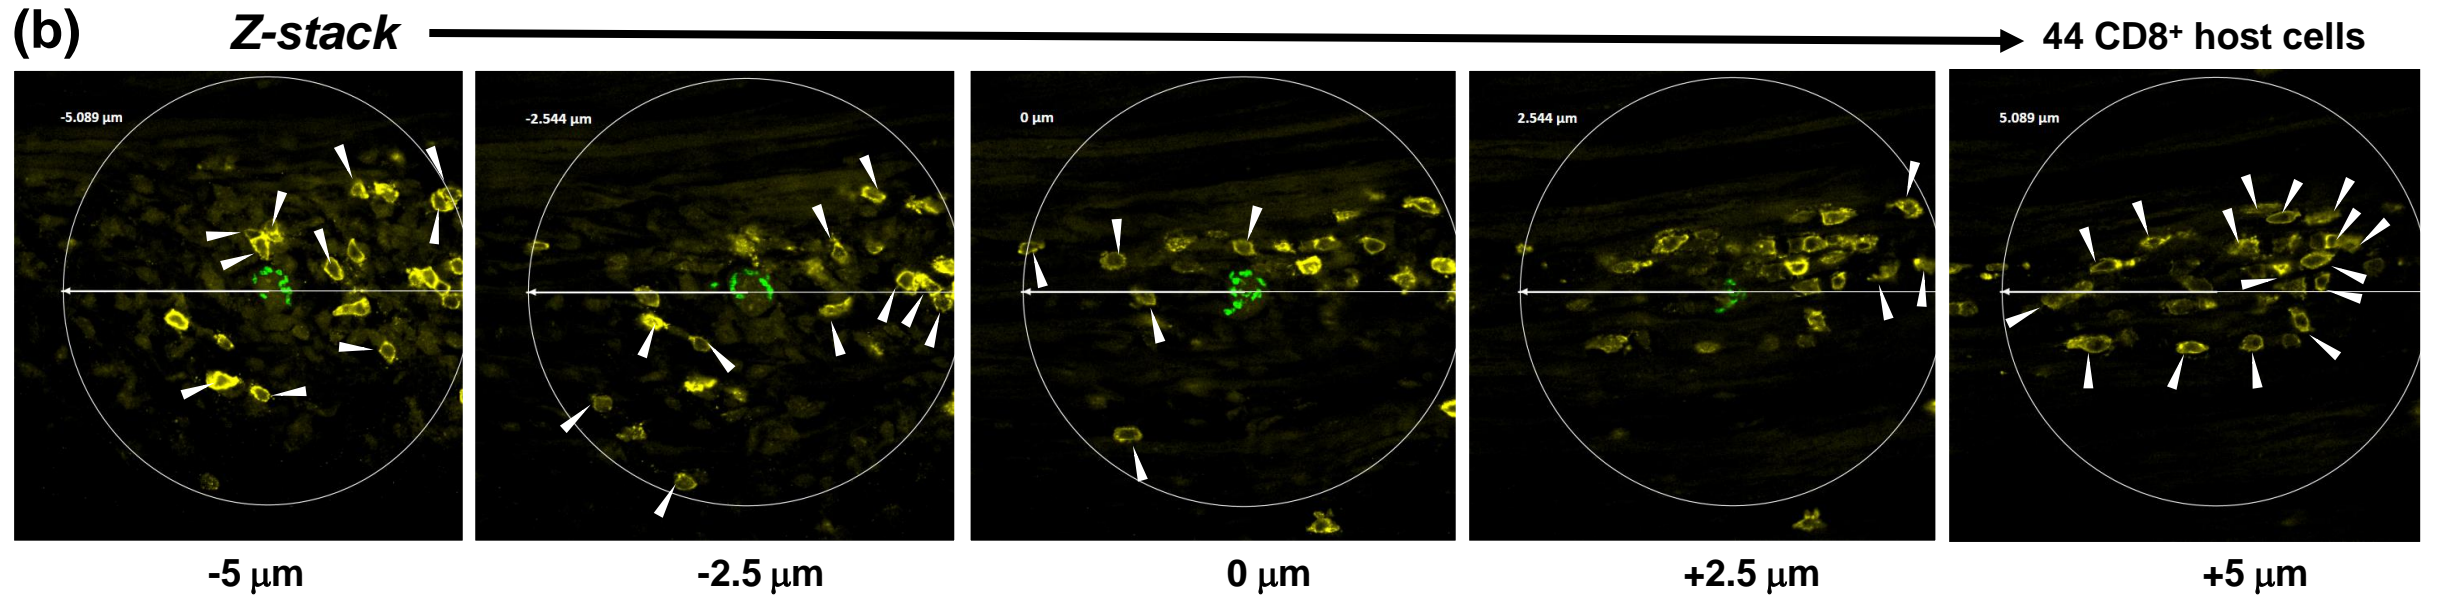

Fig. S4

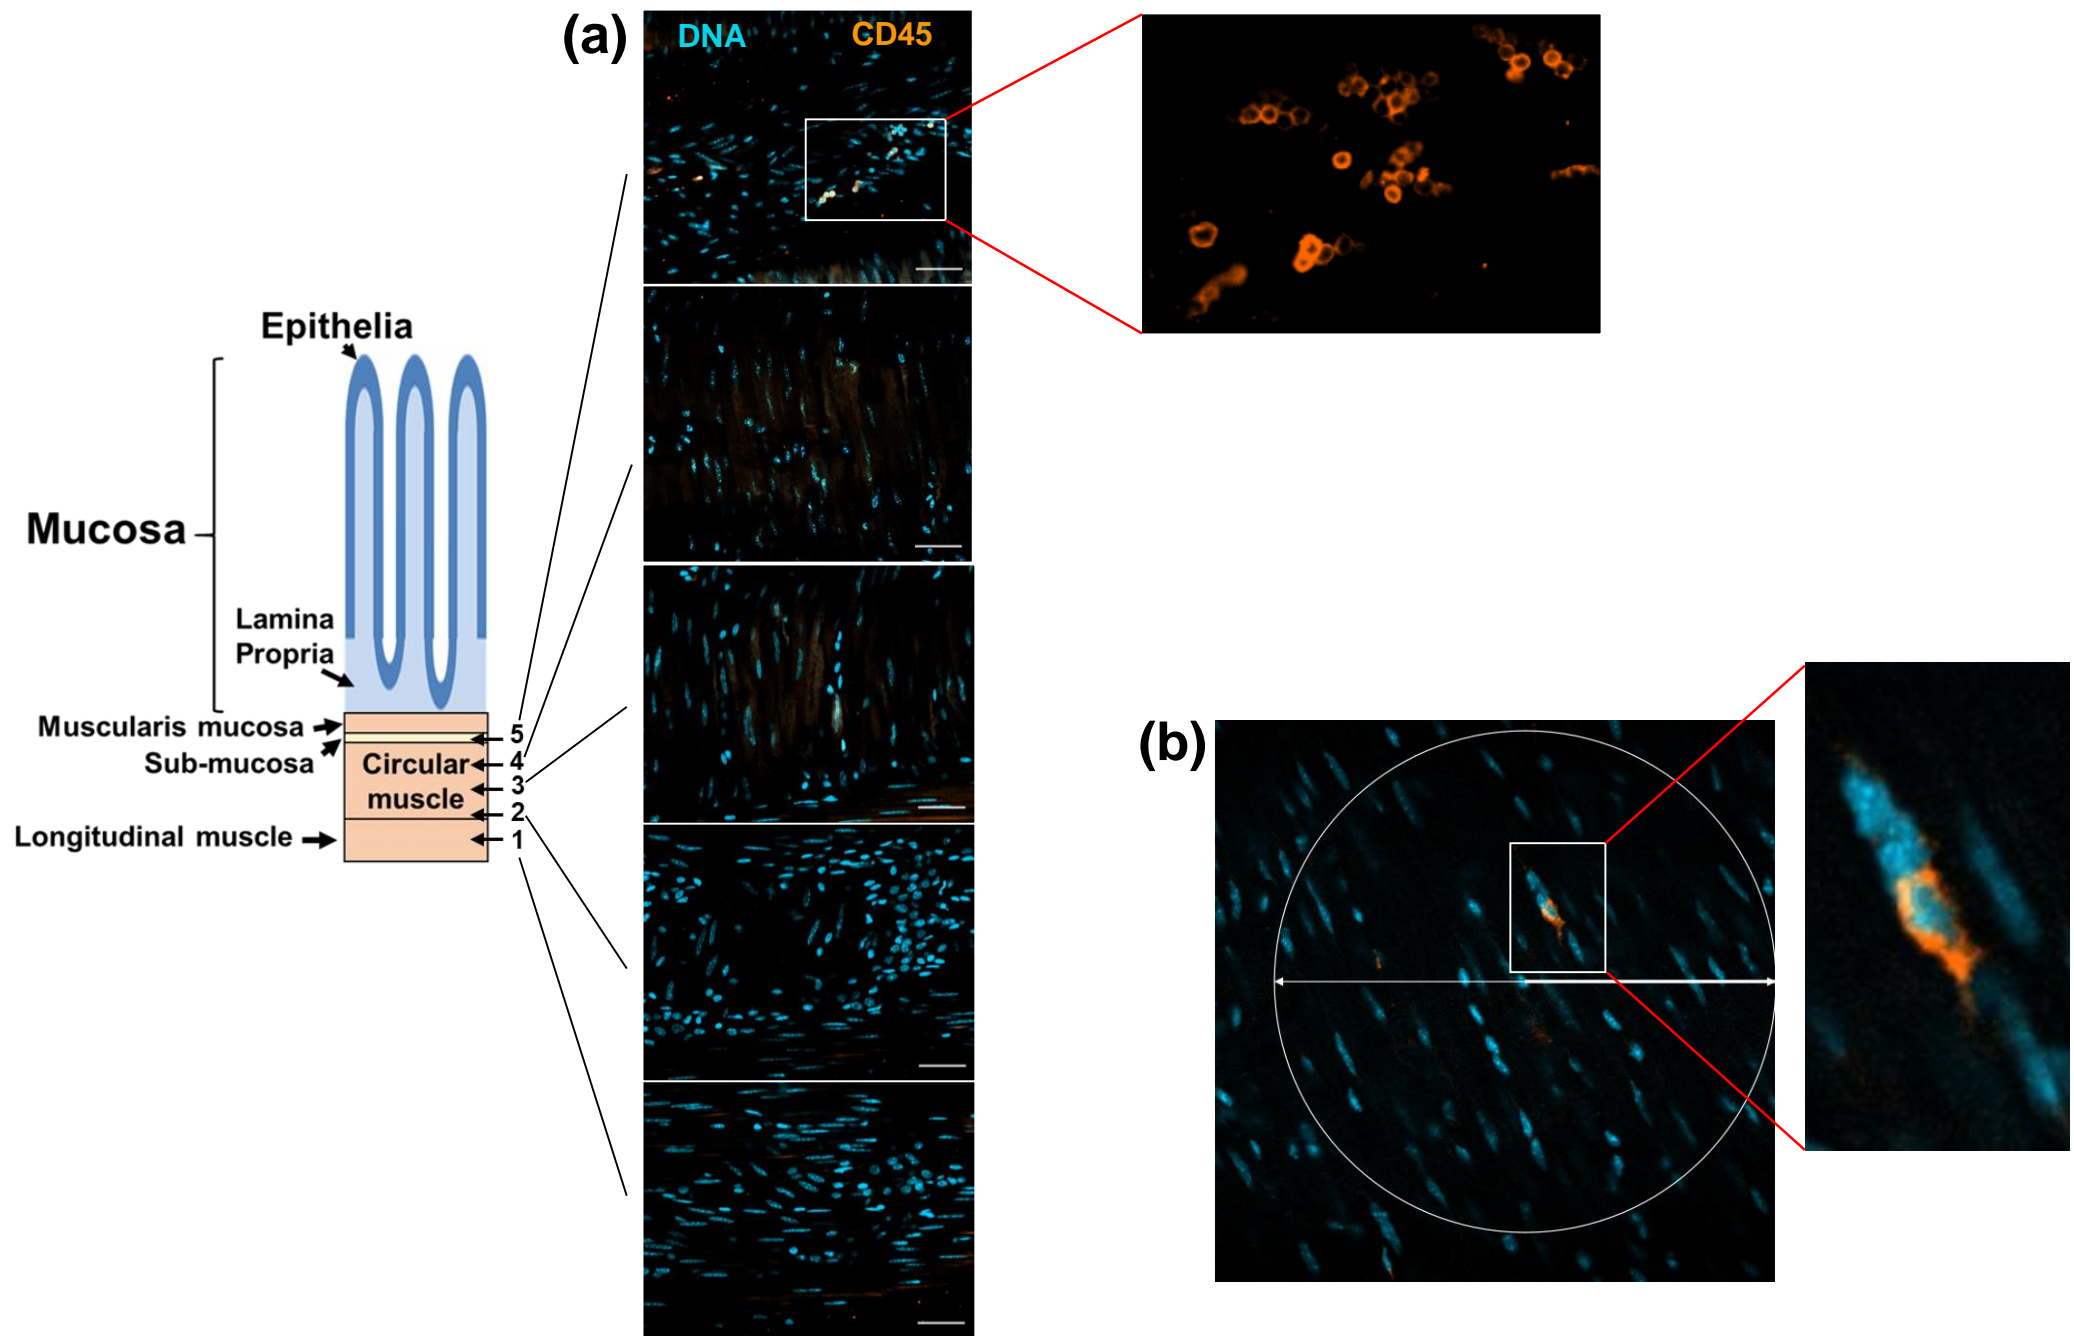

Supplement: iai.00382-21-s0001.pdf [file iai.00382-21-s0001.pdf]
